# Supplementary material
Source: PubMed Central journal article supplement (PMC8890128)

Supplementary 1A

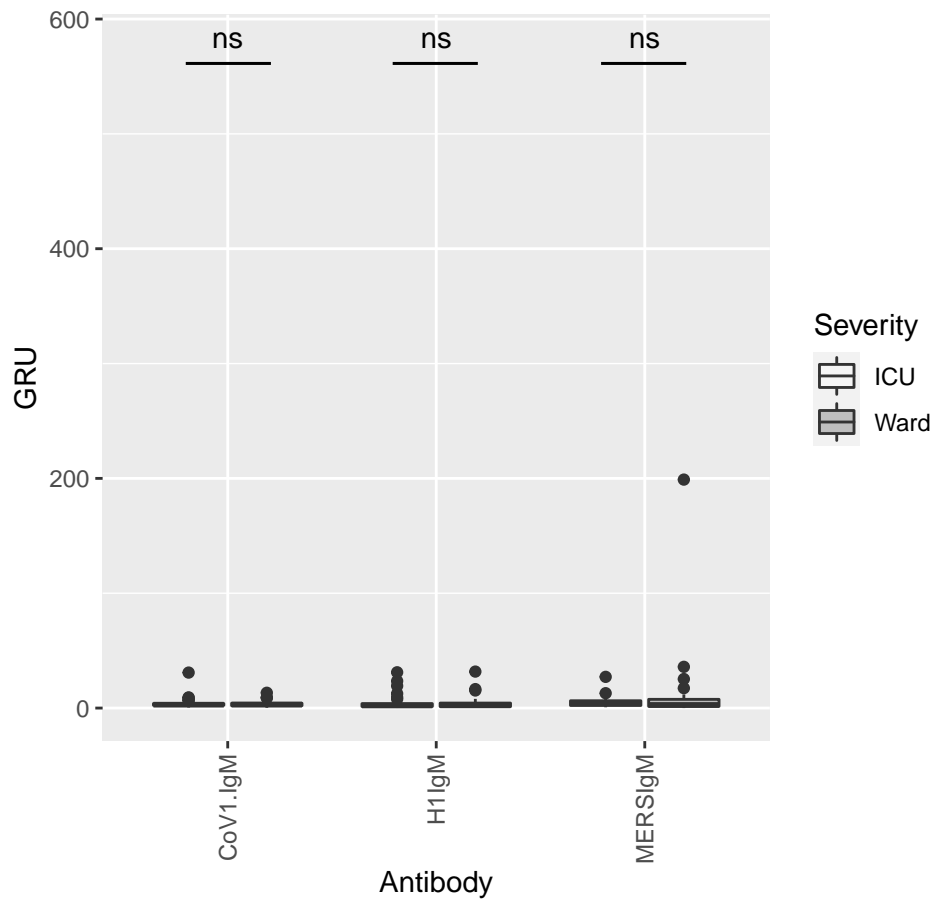

Supplementary 1B

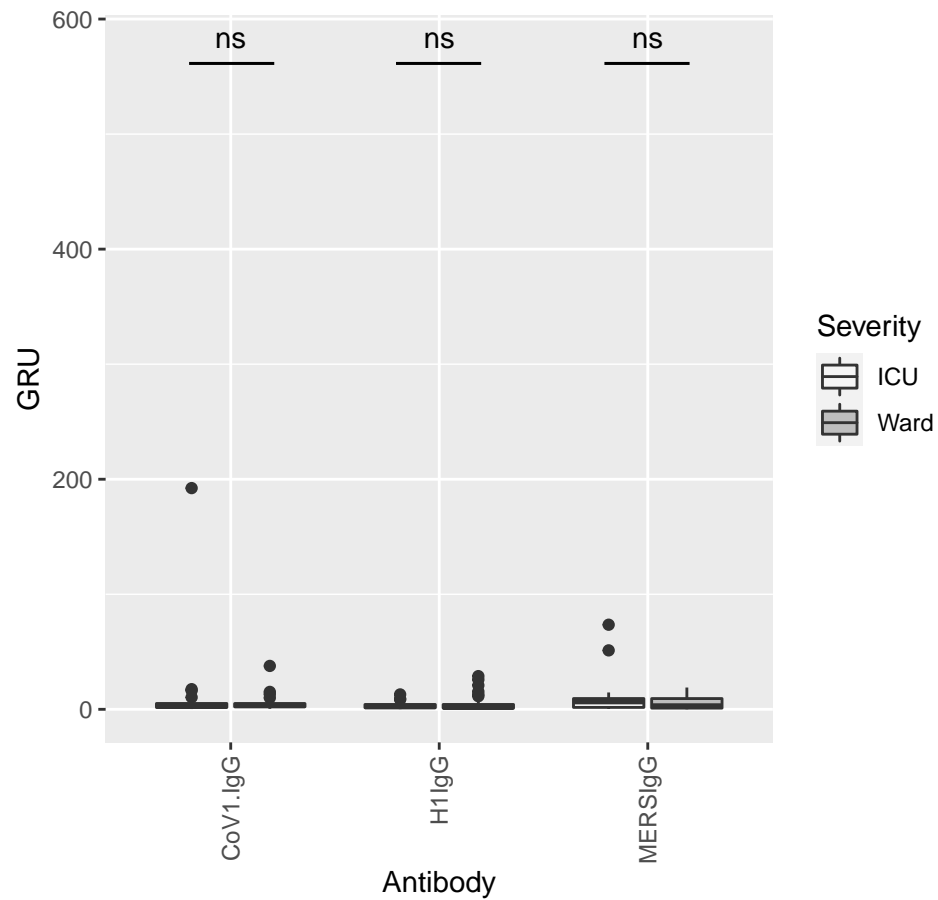

Supplement: fsoa-08-783-s1.pdf [file fsoa-08-783-s1.pdf]
